# Supplementary material
Source: PubMed Central journal article supplement (PMC9577881)
Supplement: jamapediatr-e223756-s001.pdf [file jamapediatr-e223756-s001.pdf]

## Supplementary Online Content

Ae R, Makino N, Kuwabara M, et al. Incidence of Kawasaki disease before and after the COVID-19 pandemic in Japan: results of the 26th nationwide survey, 2019 to 2020.

*JAMA Pediatr.* Published online October 17, 2022.

doi:10.1001/jamapediatrics.2022.3756

**eFigure 1.** Age Distribution in 2019 vs 2020

**eFigure 2.** Monthly Percentage Reductions in No. of Patients in 2020 According to 3 Age Groups

**eFigure 3.** Monthly Percentage Reductions in No. of Patients in 2020 According to 7 Age Groups

This supplementary material has been provided by the authors to give readers additional information about their work.

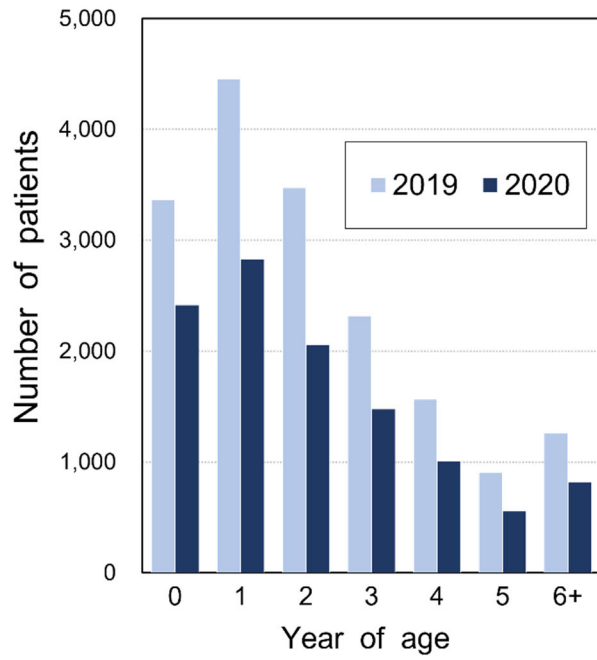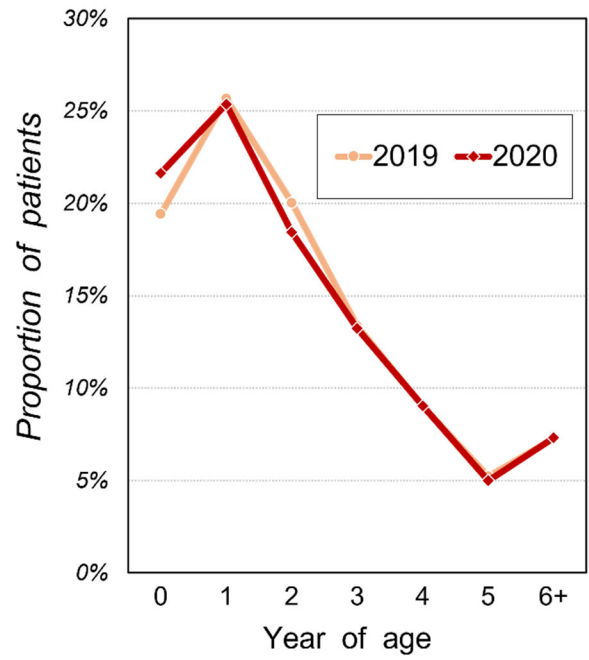

**eFigure 1.** Age distribution in 2019 vs 2020

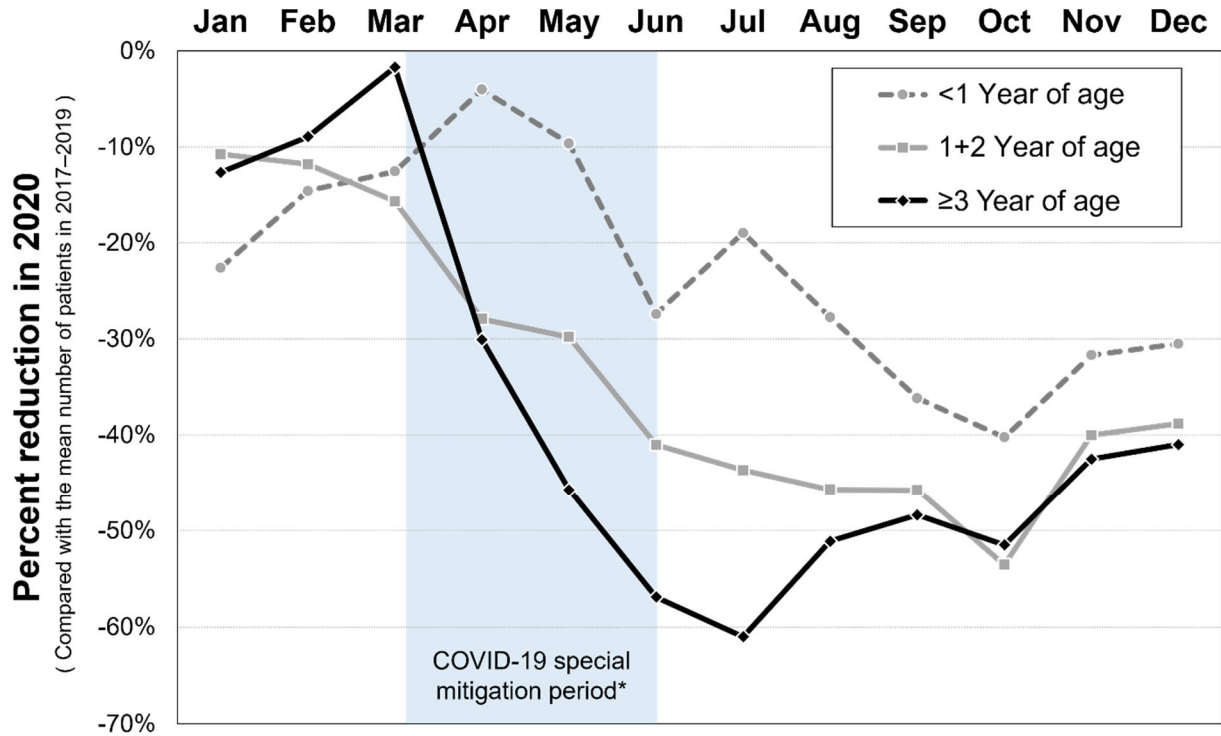

**eFigure 2.** Monthly percentage reductions in No. of patients in 2020 according to 3 age groups

Monthly percent reductions in the number of patients in 2020 were compared with the mean number of patients recorded in 2017–2019 (previous 3 years).

\*COVID-19 special mitigation period: the nationwide school closure was in effect from March 2, 2020, and subsequently a state of emergency was announced from April 7, 2020, to restrict human-to-human contact in Japan. These measures continued until the state of emergency was officially lifted on May 25, 2020.

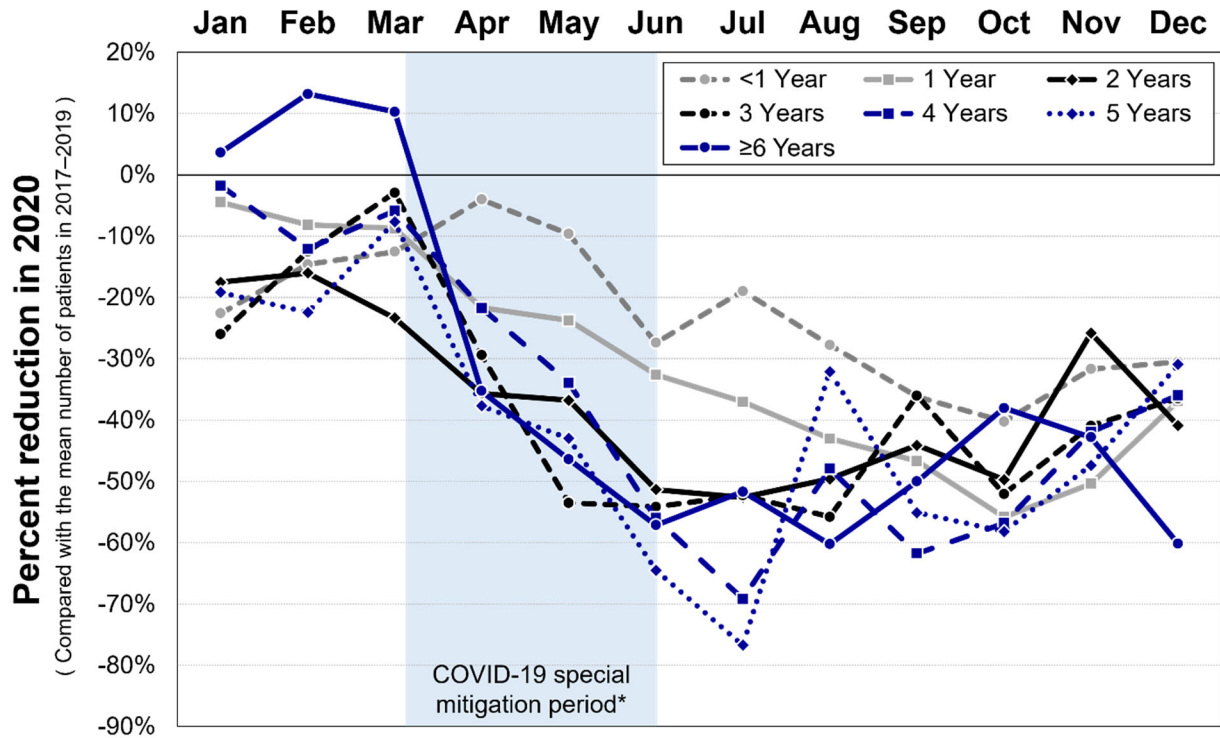

**eFigure 3.** Monthly percentate reductions in No. of patients in 2020 according to 7 age groups

Monthly percent reductions in the number of patients in 2020 were compared with the mean number of patients recorded in 2017–2019 (previous 3 years).

\*COVID-19 special mitigation period: the nationwide school closure was in effect from March 2, 2020, and subsequently a state of emergency was announced from April 7, 2020, to restrict human-to-human contact in Japan. These measures continued until the state of emergency was officially lifted on May 25, 2020.
